# Supplementary material for: Id2 GABAergic interneurons comprise a neglected fourth major group of cortical inhibitory cells
Source: eLife. 2023 Sep 4;12:e85893. doi: 10.7554/eLife.85893 (PMC10581691; doi:10.7554/eLife.85893)
Supplement: Figure 1—source data 1. — Counts of Id2 (green) and non-Id2 (red) cells from pia to white matter in Id2-CreER; Dlx5/6-Flpe; FLTG S1BF sections (n=4 brains). Each of the 20 bins used for counting were assigned to 6 layers based on the corresponding depth for the pie charts presented in the main figure. [file elife-85893-fig1-data1.xlsx]

## Sheet: Summary
			Percent distance from pia to white matter
			5	10	15	20	25	30	35	40	45	50	55	60	65	70	75	80	85	90	95	100
	M1	ID2+	19	19	15	12	10	14	5	1	3	5	3	3	1	2	6	1	5	3	4	1		132
		ID2-	6	15	51	50	54	54	55	51	60	51	43	55	69	60	45	43	27	16	11	10		826
		Interneuron	25	34	66	62	64	68	60	52	63	56	46	58	70	62	51	44	32	19	15	11		958
	M2	ID2+	28	39	25	29	19	23	5	2	7	7	4	4	6	2	2	4	5	4	7	4		226
		ID2-	12	24	58	83	85	64	85	85	101	67	53	66	75	46	47	40	21	13	9	4		1038
		Interneuron	40	63	83	112	104	87	90	87	108	74	57	70	81	48	49	44	26	17	16	8		1264
	M3	ID2+	54	30	18	18	17	18	5	5	3	8	8	4	9	2	1	3	7	13	9	3		235
		ID2-	6	35	69	76	72	58	56	66	71	53	46	63	85	63	54	37	19	18	10	5		962
		Interneuron	60	65	87	94	89	76	61	71	74	61	54	67	94	65	55	40	26	31	19	8		1197
	M4	ID2+	10	13	6	12	10	5	8	2	2	0	2	2	2	5	3	0	0	0	3	2		87
		ID2-	1	8	20	25	24	27	20	14	23	15	12	21	28	13	15	12	13	10	3	2		306
		Interneuron	11	21	26	37	34	32	28	16	25	15	14	23	30	18	18	12	13	10	6	4		393
																								3812
