# Supplementary material for: Id2 GABAergic interneurons comprise a neglected fourth major group of cortical inhibitory cells
Source: eLife. 2023 Sep 4;12:e85893. doi: 10.7554/eLife.85893 (PMC10581691; doi:10.7554/eLife.85893)
Supplement: Figure 2—source data 1. — To evaluate expression of NPY in Id2 cells, double FISH (NPY mRNA in green; tdTomato mRNA in red) was performed on thin tissue sections (20 μm) from Id2-CreER; Dlx5/6-Flpe; Ai65 brains (n=3). For cell counting, 11 sections were selected that exhibited both robust and consistent FISH signal across the S1BF area. To evaluate expression of CCK in Id2 cells, IHC for CCK was performed on thin tissue sections from Id2-CreER; Dlx5/6-Flpe; Ai65 brains (n=3). DAPI staining was included for assignment of layer identity in both staining experiments. [file elife-85893-fig2-data1.xlsx]

## Sheet: Sheet1
	L1 Id2 NPY	L1 Id2 non-NPY	L2/3 Id2 NPY	L2/3 Id2 non-NPY	L4 Id2 NPY	L4 Id2 non-NPY	L5 Id2 NPY	L5 Id2 non-NPY	L6 Id2 NPY	L6 Id2 non-NPY
ssctx1b	4	8	24	3	6	2	9	1	10	5
ssctx1c	4	9	17	2	5	0	8	1	9	3
ssctx2	4	13	20	4	11	0	6	0	5	4
ssctx3	2	6	7	4	6	0	7	1	6	6
ssctx4	2	5	18	3	6	0	5	0	7	2
ssctx4b	4	8	9	2	3	0	6	0	4	5
ssctx5	3	9	15	3	7	0	5	1	4	3
ssctx6	4	8	9	9	7	0	6	2	5	5
ssctx7	5	10	16	2	8	1	3	1	6	3
ssctx7b	6	10	16	3	7	1	8	0	11	6
ssctx8	5	18	24	3	8	0	10	1	6	4
												total cells
sums	43	104	175	38	74	4	73	8	73	46		638
% Id2 NPY	0.29		0.82		0.95		0.9		0.61
	L1 Id2 CCK	L1 Id2 non-CCK	L2/3 Id2 CCK	L2/3 Id2 non-CCK	L4 Id2 CCK	L4 Id2 non-CCK	L5 Id2 CCK	L5 Id2 non-CCK	L6 Id2 CCK	L6 Id2 non-CCK
A1	0	24	4	23	0	7	1	9	5	11
A1b	2	27	3	19	0	8	1	8	3	8
A2	0	11	5	21	0	9	2	7	3	13
A8	0	15	2	18	0	4	1	3	3	7
A4	1	18	4	20	0	5	0	5	3	6
A6	0	22	6	31	0	6	1	6	1	6
A7	0	17	2	16	0	6	0	5	0	3
A3	0	25	3	23	0	6	1	8	3	8
B1	0	27	4	27	0	11	1	11	2	10
B2	0	21	5	29	0	9	0	9	1	5
B3	1	21	6	39	1	13	1	11	4	9
B4	2	21	4	31	1	7	0	8	2	5
B6	2	26	6	36	1	6	1	6	4	13
B7	1	30	5	23	1	5	1	7	6	8
C1	0	24	6	31	0	5	1	5	0	3
C2	0	26	5	36	2	10	1	8	2	6
C3	0	28	6	35	0	6	1	10	3	11
C4	2	22	5	31	2	8	3	12	3	5
C5	0	30	4	27	1	7	2	12	4	17
												total cells	total L2-6
sums	11	435	85	516	9	138	19	150	52	154		1569	1123
% Id2 CCK	0.02		0.14		0.06		0.11		0.25				0.15
