# Supplementary material for: Id2 GABAergic interneurons comprise a neglected fourth major group of cortical inhibitory cells
Source: eLife. 2023 Sep 4;12:e85893. doi: 10.7554/eLife.85893 (PMC10581691; doi:10.7554/eLife.85893)
Supplement: Figure 4—source data 1. — This excel file consists of three workbooks, ‘Figure 4C (opto; AM251)’, ‘Figure 4D (opto; dp +-)’, and ‘Figure 4E (paired recordings)’. ‘dp’ refers to the 5 s depolarization step to +10 mV delivered to the PC to induce DSI. Cells discarded from the final data set are not listed. For optogenetics experiments, traces were discarded if the series resistance was too high (>40 MΩ), or if the holding current was too negative (<-100 pA). Cells were discarded if there were fewer than three acceptable traces, if the cell patched was clearly not a PC, or if the recording parameters deviated from the standard protocol (e.g. non-standard internal, interstim interval not 60 s, etc.). [file elife-85893-fig4-data1.xlsx]

## Sheet: Fig. 4C (opto; AM251)
Cell ID	Mouse line	M/F	Age	Pre (IPSC avg, pA)	dp (IPSC avg, pA)	dp (% decrease)	Recovery (% decrease)	Experimental condition
SD111820-12R	Dlx;Ai80	F	29	266.855	186.428	0.302986	0.0316292	Control		dp %	Control	AM251
SD111920-11R	Dlx;Ai80	M	30	367.858	269.039	0.253419	0.0150268	Control		avg	0.164299	0.0824094
SD112520-12R	Dlx;Ai80	F	36	621.55	497.523	0.191544	0.0548815	Control		sem	0.0167608	0.0142619
SD112520-21R	Dlx;Ai80	F	36	844.313	771.251	0.0786603	-0.0235525	Control		n	18	11
SD120120-11R	Dlx;Ai80	F	32	358.499	292.58	0.182367	0.0336553	Control
SD120120-23R	Dlx;Ai80	F	32	270.614	220.797	0.172921	0.120544	Control		statistics
SD120720-11R	Dlx;Ai80	F	28	276.882	227.715	0.18256	0.148724	Control		control (post vs pre)	1.02626e-06	ttest (2-tailed, paired)
IK122220-11L	Dlx;Ai80	M	43	480.728	398.578	0.152209	0.0128048	Control		control (post vs recovery)	5.8086e-06	ttest (2-tailed, paired)
IK020921-11L	Dlx;Ai80	F	30	275.997	207.564	0.227498	n/a	Control		dp% (Control vs AM251)	0.00223222	ttest (2-tailed, unpaired)
IK020921-21R	Dlx;Ai80	F	30	474.537	438.456	0.0767943	-0.0132068	Control
IK020921-31L	Dlx;Ai80	F	30	224.148	174.548	0.207305	0.0786456	Control
IK020921-31R	Dlx;Ai80	F	30	59.7044	51.1417	0.144397	0.0388954	Control
SD020921-11R	Dlx;Ai80	F	30	303.622	247.553	0.179624	0.0561722	Control
SD020921-12R	Dlx;Ai80	F	30	319.218	275.222	0.137916	-0.0407935	Control
SD020921-32L	Dlx;Ai80	F	30	204.324	171.803	0.136842	-0.0334952	Control
SD021321-22L	Dlx;Ai80	M	34	69.2709	58.6975	0.146558	-0.113677	Control
SD021321-32L	Dlx;Ai80	M	34	436.654	348.422	0.200169	-0.125707	Control
SD021321-42R	Dlx;Ai80	M	34	224.143	223.036	-0.0163856	0.0137119	Control
SD122220-21R	Dlx;Ai80	M	43	1207.18	1137.15	0.0575024	-0.00222303	AM251
SD122220-22R	Dlx;Ai80	M	43	1393.66	1265.29	0.0857298	-0.0393417	AM251
SD122220-31R	Dlx;Ai80	M	43	1211.2	1071.96	0.0823355	-0.0238648	AM251
SD122320-11R	Dlx;Ai80	M	44	813.422	756.733	0.0627286	0.0129258	AM251
SD122320-31R	Dlx;Ai80	M	44	861.542	803.609	0.0601758	-0.0546832	AM251
IK021621-11R	Dlx;Ai80	M	37	333.427	319.181	0.0396335	-0.0540382	AM251
IK021621-31R	Dlx;Ai80	M	37	274.792	255.252	0.0701412	0.0347315	AM251
IK021621-31L	Dlx;Ai80	M	37	432.186	359.684	0.160018	0.0565057	AM251
IK021621-41R	Dlx;Ai80	M	37	294.181	257.754	0.121699	0.0906221	AM251
IK032521-11L	Dlx;Ai80	F	31	462.069	453.168	0.00806214	-0.0804951	AM251
IK032521-21L	Dlx;Ai80	F	31	309.773	260.76	0.158478	0.0106799	AM251

## Sheet: Fig. 4D (opto; dp+-)
Cell ID	Mouse line	M/F	Age	dp+ pre (IPSC avg, pA)	dp+ post (IPSC avg, pA)	dp+ (IPSC avg, %)	dp- pre (IPSC avg, pA)	dp- post (IPSC avg, pA)	dp- (IPSC avg, %)			dp+	dp-
SD020921-12R	Dlx;Ai80	F	30	319.218	275.222	0.862084	305.161	281.065	0.923958		avg	0.859349	0.963885
SD020921-32L	Dlx;Ai80	F	30	204.324	171.803	0.863158	187.412	176.937	0.947015		sem	0.0206838	0.015214
IK020921-21R	Dlx;Ai80	F	30	474.537	438.456	0.923206	462.182	462.738	1.00292		ttest (2-tailed, paired)	0.0142931
IK020921-31L	Dlx;Ai80	F	30	224.148	174.548	0.792695	178.619	179.865	0.99589
IK020921-31R	Dlx;Ai80	F	30	59.7044	51.1417	0.855603	66.3837	62.8644	0.949646

## Sheet: Fig. 4E (paired recordings)
Cell ID (presynaptic)	Cell ID (postsynaptic)	Cell type (pre)	Cell type (post)	Mouse Line	M/F	Age	Intersoma distance (µm)	Connected? (Y/N)	IPSC amplitude (avg±sem,n)	DSI observed? (Y/N)	Comments
SD010621-13L	SD010621-14R	LS	PC	Dlx	M	47	26	Y	15±1,10	N			Cell type (pre)	LS	LS* (bold excluded)	nonLS	nonLS* (bold excluded)
SD010621-22L	SD010621-23R	LS	PC	Dlx	M	47	32.7476	Y	11±1,10	N			# patched	27	26	46	41
IK051821-21R	IK051821-22L	LS	PC	Dlx	M	30	30	Y	27±4,4	N			# connect	19	18	9	9
SD060121-51R	SD060121-53L	LS	PC	Dlx	F	30	93	Y	14±1,11	N	PC identity assumed. Did not verify by firing pattern, but it looked like PC by visual inspection.		P(connect)	0.703704	0.692308	0.195652	0.219512
IK122920-21R	IK122920-22L	LS	PC	Dlx	M	39	<50	Y	51±3,6	N
IK041521-21R	IK041521-22L	LS	PC	Dlx	F	33	50	Y	26±2,10	N
IK050421-31R	IK050421-32L	LS	PC	Dlx	F	42	10	Y	29±2,10	N
SD010521-31L	SD010521-32R	LS	PC	Dlx	F	46	61	Y	26±5,10	N	DSI not included in reported numbers because the PC internal was cesium-based. IN internal was standard.
SD122920-21L	SD122920-23R	LS	PC	Dlx	M	39	57	Y	7±1,6	N
IK092121-21R	IK092121-22L	LS	PC	NPY	M	44	10	Y	6±1,10	N
SD020421-13L	SD020421-15R	LS	PC	Dlx	M	44	47	Y	16,1	N	DSI not included in reported numbers since it was done in CC mode.
SD122920-32L	SD122920-33R	LS	PC	Dlx	M	39	74	Y	10±1,14	n/a
SD120920-31L	SD120920-32R	LS	PC	Dlx	M	31	37	Y	16±2,10	n/a
IK060121-31R	IK060121-32L	LS	PC	Dlx	F	30	30	Y	20±1,5	n/a
SD120220-21R	SD120220-22L	LS	PC	Dlx	F	32	58	Y	33±1,44	n/a
SD121420-23L	SD121420-24R	LS	PC	Dlx	M	44	47	Y	35±5,12	n/a
IK052521-31R	IK052521-32L	LS	PC	Dlx	M	37	30	Y	6±1,15	n/a
SD020421-22R	SD020421-23L	LS	PC	Dlx	M	44	73	Y	n/a	n/a	Done in CC mode. IPSP < 1mV
SD123020-22L	SD123020-23R	LS	PC	Dlx	M	40	48	Y	n/a	n/a	Connection not seen in VC mode, only in CC mode.
SD011221-24R	SD011221-23L	LS	PC	Dlx	F	53	40	N	n/a	n/a
SD020121-12L	SD020121-14R	LS	PC	Dlx	F	40	50	N	n/a	n/a
SD020121-21R	SD020121-23L	LS	PC	Dlx	F	40	83	N	n/a	n/a
SD020421-24R	SD020421-25L	LS	PC	Dlx	M	44	90	N	n/a	n/a
SD120220-11R	SD120220-12L	LS	PC	Dlx	F	32	78	N	n/a	n/a
SD120220-32L	SD120220-33R	LS	PC	Dlx	F	32	50	N	n/a	n/a
SD120920-42L	SD120920-43R	LS	PC	Dlx	M	31	57	N	n/a	n/a
SD121020-12L	SD121020-13R	LS	PC	Dlx	M	32	32	N	n/a	n/a
SD101921-11R	SD101921-13L	BS	PC	NPY	F	32	42	Y	12±2,5	Y
IK060121-41R	IK060121-42L	BS	PC	Dlx	F	30	35	Y	7±1,13	N
IK061422-11R	IK061422-12L	α7?	PC	NPY	M	30	30	Y	20±1,7	N	α7 identity presumed based on cell properties and morpholoy
SD120920-11L	SD120920-12R	IS	PC	Dlx	M	31	33	Y	8±1,14	Y
IK122920-11R	IK122920-12L	BS	PC	Dlx	M	39	<50	Y	20±2,14	Y
IK101921-11R	IK101921-12L	IS	PC	NPY	F	32	10	Y	4±1,10	n/a
SD101921-11R	SD101921-12L	BS	PC	NPY	F	32	35	Y	14.9482	n/a
SD121420-13L	SD121420-14R	IS	PC	Dlx	M	44	n.d.	Y	n/a	n/a	File showing connection not saved.
SD123020-31L	SD123020-32R	IS	PC	Dlx	M	40	80	Y	14±1,10	n/a
HZ100721-11R	HZ100721-12L	IS	PC	NPY	F	34	33	N	n/a	n/a
IK010521-11R	IK010521-12L	BS	PC	Dlx	F	46	<50	N	n/a	n/a
IK011221-21R	IK011221-22L	IS	PC	Dlx	F	53	<50	N	n/a	n/a
IK011221-31R	IK011221-32L	IS	PC	Dlx	F	53	<50	N	n/a	n/a
IK041521-11R	IK041521-12L	BS	PC	Dlx	F	33	<50	N	n/a	n/a
IK050421-11R	IK050421-12L	BS	PC	Dlx	F	42	25	N	n/a	n/a
IK052521-41R	IK052521-42L	IS	PC	Dlx	M	37	40	N	n/a	n/a
IK061422-21R	IK061422-22L	IS	PC	NPY	M	30	50	N	n/a	n/a
IK061422-31R	IK061422-32L	FS	PC	NPY	M	30	50	N	n/a	n/a	Presynaptic did not look like a mispatch, but it had FS-like properties.
IK062122-11R	IK062122-12L	IS	PC	NPY	M	36	30	N	n/a	n/a
IK062122-11R	IK062122-13L	IS	PC	NPY	M	36	40	N	n/a	n/a
IK062122-21R	IK062122-22L	BS	PC	NPY	M	36	40	N	n/a	n/a
IK062122-31R	IK062122-32L	IS	PC	NPY	M	36	20	N	n/a	n/a
IK092121-11R	IK092121-12L	IS	PC	NPY	M	44	50	N	n/a	n/a
IK092121-31R	IK092121-32L	IS	PC	NPY	M	44	20	N	n/a	n/a
IK092121-41R	IK092121-42L	nonLS	PC	NPY	M	44	10	N	n/a	n/a	nonLS and PC assumed by visual inspection. No firing properties obtained.
IK092121-51R	IK092121-52L	IS	PC	NPY	M	44	30	N	n/a	n/a
IK101921-31R	IK101921-32L	IS	PC	NPY	F	32	10	N	n/a	n/a
SD020121-42L	SD020121-41R	IS	PC	Dlx	F	40	32	N	n/a	n/a
SD020121-42L	SD020121-43R	IS	PC	Dlx	F	40	72	N	n/a	n/a
SD040622-31R	SD040622-32L	FS	PC	NPY	F	42	89	N	n/a	n/a	Presynaptic did not look like a mispatch, but it had FS-like properties.
SD040622-31R	SD040622-33L	FS	PC	NPY	F	42	81.5	N	n/a	n/a	Presynaptic did not look like a mispatch, but it had FS-like properties.
SD041521-21R	SD041521-22L	BS	PC	Dlx	F	33	43	N	n/a	n/a
SD050421-12L	SD050421-11R	IS	PC	Dlx	F	42	32	N	n/a	n/a
SD050421-12L	SD050421-13R	IS	PC	Dlx	F	42	80	N	n/a	n/a
SD050421-12L	SD050421-14R	IS	PC	Dlx	F	42	130	N	n/a	n/a
SD050421-12L	SD050421-15R	IS	PC	Dlx	F	42	100	N	n/a	n/a
SD050421-12L	SD050421-16R	IS	PC	Dlx	F	42	36	N	n/a	n/a
SD060822-11R	SD060822-12F	IS	PC	NPY	M	37	118	N	n/a	n/a
SD062122-21R	SD062122-22F	IS	PC	NPY	M	36	150	N	n/a	n/a
SD092121-21R	SD092121-23L	BS	PC	NPY	M	44	111	N	n/a	n/a	PC identity assumed. Did not verify by firing pattern, but it looked like PC by visual inspection.
SD092121-21R	SD092121-24L	BS	PC	NPY	M	44	72	N	n/a	n/a
SD092121-33L	SD092121-31R	BS	PC	NPY	M	44	41	N	n/a	n/a
SD101921-11R	SD101921-14L	BS	PC	NPY	F	32	53	N	n/a	n/a
SD120320-11L	SD120320-12R	IS	PC	Dlx	F	33	44	N	n/a	n/a
SD120320-22L	SD120320-23R	IS	PC	Dlx	F	33	85	N	n/a	n/a
SD123020-12L	SD123020-13R	IS	PC	Dlx	M	40	49	N	n/a	n/a
