# Supplementary material for: Id2 GABAergic interneurons comprise a neglected fourth major group of cortical inhibitory cells
Source: eLife. 2023 Sep 4;12:e85893. doi: 10.7554/eLife.85893 (PMC10581691; doi:10.7554/eLife.85893)
Supplement: Table 1—source data 1. — This excel spreadsheet lists all of the cells patched alongside their electrophysiological parameters. The file consists of two workbooks, ‘tabulation’ containing the parameters for each cell, and ‘summary’ containing the summary data (average, sem, n) for each cell type. For some cells, no values are reported for some parameters and these cells are marked ‘n/a.’ A small number of cells were patched with an internal solution different than that reported in the methods. Electrophysiology parameters for these cells were not reported, as differences in internal solution can have significant impacts on electrophysiological parameters, but the cells were counted alongside the rest for the proportions reported in Figure 3. These cells were marked as ‘0’ in the ‘Internal’ column or ‘1’ otherwise. Several cells categorized as LS do not have a value for the AP latency as for these cells a voltage trace bearing a single AP was not obtained. Nevertheless, these cells were confidently labeled LS as the late-onset of the APs is evident even in multiple AP traces. Cells patched in slices with NPY-GFP (i.e. Id2-CreER; Dlx5/6-Flpe; Ai65; NPY-hrGFP) are not listed in this file as the parameters summarized in Table 1 were only taken from the unbiased cross (i.e. Id2-CreER; Dlx5/6-Flpe; Ai65). [file elife-85893-table1-data1.xlsx]

## Sheet: tabulation
								Intrinsic Properties		AP Waveform Properties					Firing Properties
Cell Type	Cell ID	Experiment	Layer	M/F	Age	Internal	1st AP latency	Rm	Tau	AP half-width	AP thresh	AP rise	AP fall	AHP	Rb	Firing Rate (2xRb)	Firing regularity (2xRb)	Adaptation (near Rb)	Adaptation (2xRb)
LS cells in L2/3
LS	HZ060821-21R	Morph / Charac	2/3	M	34	1	n/a	242.5	13.6367	0.84066	-15.0004	153.198	-57.3934	9.32312	n/a	35.8295	0.0582984	1.32236	0.572482
LS	HZ060821-51R	Morph / Charac	2/3	M	34	1	n/a	150	5.96266	n/a	n/a	n/a	n/a	n/a	453.459	n/a	n/a	n/a	n/a
LS	HZ070121-31R	Morph / Charac	2/3	M	35	1	784.055	125	11.3771	0.539091	-49.0948	239.451	-93.5765	11.3301	n/a	16.4309	0.0340144	n/a	0.764386
LS	HZ070121-41R	Morph / Charac	2/3	M	35	1	796.07	145	9.8114	0.482175	-18.6697	275.879	-116.202	10.2328	338.501	n/a	n/a	n/a	n/a
LS	HZ070721-21R	Morph / Charac	2/3	M	35	1	948.313	110	9.64797	0.706787	-32.1732	165.1	-78.7926	8.19492	n/a	26.0821	0.0372123	n/a	0.609885
LS	SD010521-31L	Pairs	2/3	F	46	1	n/a	100	7.09158	n/a	n/a	n/a	n/a	n/a	200.011	n/a	n/a	n/a	n/a
LS	SD010521-41L	Pairs	2/3	F	46	1	948.31	172.5	n/a	0.40629	-30.3082	317.407	-135.645	12.652	215.156	n/a	n/a	1.21922	n/a
LS	SD010621-13L	Pairs	2/3	M	47	1	803.78	220	11.2988	0.795007	-35.3546	171.265	-67.0776	11.0077	n/a	n/a	n/a	n/a	n/a
LS	SD010621-22L	Pairs	2/3	M	47	1	n/a	134	11.2228	0.763753	-34.816	472.931	-84.7778	16.4627	140.122	n/a	n/a	n/a	n/a
LS	SD020121-12L	Pairs	2/3	F	40	1	686.59	88	n/a	0.352138	-21.6446	499.023	-152.649	19.1177	n/a	n/a	n/a	n/a	n/a
LS	SD020421-11L	Pairs	2/3	M	43	1	n/a	200	9.36385	0.567508	-28.7521	216.858	-87.2192	17.1768	200.003	n/a	n/a	0.975766	n/a
LS	SD020421-13L	Pairs	2/3	M	43	1	n/a	160.714	10.9782	0.612244	-37.8754	273.071	-98.1903	11.0481	n/a	n/a	n/a	n/a	n/a
LS	SD051821-22L	Pairs	2/3	M	30	1	n/a	180	13.3845	0.902915	-31.7108	212.952	-53.3447	17.2028	n/a	n/a	n/a	0.836559	n/a
LS	SD052521-13L	Pairs	2/3	M	37	1	821.07	221	n/a	0.870039	-31.723	227.966	-65.4907	16.2903	n/a	n/a	n/a	n/a	n/a
LS	SD052521-22L	Pairs	2/3	M	37	1	950.36	238.182	n/a	1.07277	-35.1071	145.616	-48.367	17.7697	n/a	n/a	n/a	1.06582	n/a
LS	SD060121-11L	Pairs	2/3	F	30	1	651	130	n/a	n/a	n/a	n/a	n/a	n/a	n/a	n/a	n/a	0.974875	n/a
LS	SD060121-13L	Pairs	2/3	F	30	1	746.13	156	12.9085	n/a	n/a	n/a	n/a	n/a	n/a	n/a	n/a	1.18151	n/a
LS	SD060121-23L	Pairs	2/3	F	30	1	739.6	236	n/a	1.06138	-35.3009	192.554	-50.6348	11.319	n/a	n/a	n/a	1.00745	n/a
LS	SD060121-24L	Pairs	2/3	F	30	1	854.9	145	9.43518	0.736926	-18.3716	163.281	-62.2314	11.0913	n/a	37.0044	0.0388013	1.19748	0.727486
LS	SD060121-31L	Pairs	2/3	F	30	1	274	n/a	14.8172	0.670172	-43.2915	361.725	-102.112	8.02536	86.0311	n/a	n/a	n/a	n/a
LS	SD060121-43L	Pairs	2/3	F	30	1	679.17	257	n/a	0.621356	-35.9726	358.704	-101.969	14.7893	n/a	n/a	n/a	n/a	n/a
LS	SD060221-13L	Pairs / Morph	2/3	M	31	1	907.1	200	12.9179	0.723506	-36.1694	248.901	-72.0215	19.3359	n/a	n/a	n/a	n/a	n/a
LS	SD060221-16L	Pairs / Morph	2/3	M	31	1	n/a	220	14.1475	0.835315	-40.4608	245.483	-58.8379	15.152	80.1379	n/a	n/a	1.08778	n/a
LS	SD061621-13L	Morph / Charac	2/3	F	45	1	n/a	n/a	n/a	0.730512	-28.4963	252.401	-67.5049	12.8632	n/a	n/a	n/a	n/a	n/a
LS	SD061621-23L	Morph / Charac	2/3	F	45	1	732.355	187.5	n/a	0.504545	-50.1434	471.008	-112.671	14.8071	65.7016	26.8718	0.0582104	2.548	0.917769
LS	SD063021-12L	Morph / Charac	2/3	M	34	1	772.627	155	n/a	0.571208	-40.8286	337.088	-94.2732	9.73118	126.613	44.0218	0.0661325	n/a	0.735845
LS	SD063021-22L	Morph / Charac	2/3	M	34	1	939.416	85	n/a	0.429417	-37.1536	340.546	-135.254	13.1226	347.977	56.2408	0.0403196	1.32029	0.833299
LS	SD072821-11L	Morph / Charac	2/3	M	35	1	980.692	250	n/a	0.510193	-31.9534	416.87	-107.666	18.1213	90.7746	37.9753	0.0465506	1.0788	0.796789
LS	SD072821-22L	Morph / Charac	2/3	M	35	1	908.092	200	14.7942	0.551768	-41.2603	380.859	-114.746	13.6983	121.199	47.689	0.0351168	0.485969	0.637351
LS	SD120220-12L	Pairs	2/3	F	32	1	843	130	n/a	0.859872	-30.8685	216.187	-63.8428	18.1549	n/a	n/a	n/a	1.23708	n/a
LS	SD120220-21L	Pairs	2/3	F	32	1	n/a	150	8.5657	n/a	n/a	n/a	n/a	n/a	n/a	n/a	n/a	n/a	n/a
LS	SD120220-32L	Pairs	2/3	F	32	1	885.725	160	n/a	0.483745	-30.8189	255.859	-102.386	20.8397	n/a	n/a	n/a	n/a	n/a
LS	SD120520-14L	Pairs	2/3	M	35	1	865.04	190	n/a	0.808418	-22.6227	168.457	-53.2227	14.2365	n/a	n/a	n/a	1.01869	n/a
LS	SD120920-31L	Pairs	2/3	M	31	1	n/a	185	n/a	n/a	n/a	n/a	n/a	n/a	n/a	n/a	n/a	n/a	n/a
LS	SD120920-42L	Pairs	2/3	M	31	1	661.5	172	10.6376	0.415083	-31.6698	523.647	-160.819	15.5897	151.959	n/a	n/a	1.65016	n/a
LS	SD121020-12L	Pairs	2/3	M	32	1	682.84	240	13.2762	0.644265	-40.3809	394.043	-87.2803	16.5039	100.145	n/a	n/a	0.744784	n/a
LS	SD121420-12L	Pairs	2/3	M	44	1	845.3	166	9.03006	0.39802	-47.6044	478.271	-144.531	11.5082	120.053	n/a	n/a	0.937923	n/a
LS	SD121420-23L	Pairs	2/3	M	44	1	n/a	208	14.2756	0.952006	-34.6608	295.492	-58.5124	20.2403	n/a	n/a	n/a	1.42737	n/a
LS	SD122920-21L	Pairs	2/3	M	39	1	686.66	180	10.0558	0.674999	-31.9624	370.466	-86.635	14.0329	130.006	n/a	n/a	0.893077	n/a
LS	SD122920-32L	Pairs	2/3	M	39	1	951.97	208	n/a	0.796239	-42.1021	432.495	-98.877	12.8479	n/a	n/a	n/a	1.03465	n/a
LS	SD123020-22L	Pairs	2/3	M	40	1	n/a	211	n/a	0.851763	-30.1483	232.239	-62.6221	17.5751	230.24	n/a	n/a	1.04648	n/a
LS	IK010521-31R	Pairs	2/3	F	46	1	905.06	220	13.6455	0.977916	-33.4969	100.138	-38.0656	8.47143	110	39	0.06039	n/a	0.758225
LS	IK041521-21R	Pairs	2/3	F	33	1	n/a	156	11.5191	0.651466	-31.6606	256.681	-90.554	10.8837	n/a	n/a	0.06059	n/a	n/a
LS	IK050421-31R	Pairs	2/3	F	42	1	n/a	195	13.3045	0.751277	-39.2876	212.784	-76.8662	10.8757	n/a	n/a	n/a	n/a	n/a
LS	IK051821-12R	Pairs	2/3	M	30	1	n/a	131	14.9626	0.68246	-31.2042	256.563	-83.3668	14.2185	160	40.3333	0.0399189	n/a	0.764254
LS	IK060121-21R	Pairs	2/3	F	30	1	n/a	340	16.9982	0.68786	-40.6006	157.654	-80.0781	14.6454	70	57	0.0480429	n/a	0.884022
LS	IK060121-31R	Pairs	2/3	F	30	1	978.71	185	14.3433	1.07763	-27.0487	113.246	-46.4376	12.9026	170	n/a	n/a	n/a	n/a
LS	IK122920-21R	Pairs	2/3	M	39	1	n/a	127.5	11.4555	0.719189	-30.0674	288.582	-79.0787	20.3114	140	n/a	n/a	n/a	n/a
LS	SD011221-24R	Pairs	2/3	F	53	1	902.31	120	8.136	n/a	n/a	n/a	n/a	n/a	n/a	n/a	n/a	n/a	n/a
LS	SD020121-21R	Pairs	2/3	F	40	1	777.52	n/a	n/a	n/a	n/a	n/a	n/a	n/a	n/a	n/a	n/a	n/a	n/a
LS	SD020421-21R	Pairs	2/3	M	43	1	n/a	209	12.8351	n/a	n/a	n/a	n/a	n/a	n/a	n/a	n/a	n/a	n/a
LS	SD020421-22R	Pairs	2/3	M	43	1	n/a	225	12.6508	1.00729	-18.3212	86.4563	-32.7606	6.88782	n/a	n/a	0.0515636	n/a	n/a
LS	SD020421-24R	Pairs	2/3	M	43	1	n/a	172.5	8.14629	n/a	n/a	n/a	n/a	n/a	n/a	n/a	n/a	n/a	n/a
LS	SD060121-51R	Pairs	2/3	F	30	1	800.94	155	9.36148	0.740676	-41.3029	305.089	-81.6476	14.8791	n/a	n/a	n/a	n/a	n/a
LS	SD060221-21R	Pairs / Morph	2/3	M	31	1	707.66	375	21.8418	0.707564	-47.1791	213.468	-67.5826	15.7781	30.0392	n/a	n/a	n/a	n/a
LS	SD060221-22R	Pairs / Morph	2/3	M	31	1	n/a	290	19.3265	0.730033	-37.8153	297.77	-76.1719	19.38	67.8367	n/a	n/a	n/a	n/a
LS	SD060221-23R	Pairs / Morph	2/3	M	31	1	n/a	196.25	12.4207	0.718932	-38.8963	345.244	-76.9546	18.6157	100.928	n/a	n/a	n/a	n/a
LS	SD060221-31R	Pairs / Morph	2/3	M	31	1	624.18	300	15.2865	0.840845	-37.4084	210.531	-67.1794	16.1784	n/a	n/a	n/a	n/a	n/a
LS	SD060221-32R	Pairs / Morph	2/3	M	31	1	n/a	175	n/a	0.836989	-40.8285	273.608	-72.9167	16.3224	n/a	n/a	n/a	n/a	n/a
LS	SD060821-11R	Morph / Charac	2/3	M	34	1	900.61	230	13.9589	0.504653	-40.8395	478.184	-104.492	20.4415	81.0374	33.8546	0.060822	n/a	0.810058
LS	SD060821-13R	Morph / Charac	2/3	M	34	1	n/a	200	n/a	n/a	n/a	n/a	n/a	n/a	n/a	n/a	n/a	n/a	n/a
LS	SD060821-24R	Morph / Charac	2/3	M	34	1	726.545	230	13.2652	0.640739	-44.1592	300.313	-88.3993	12.3171	70.9245	28.962	0.10288	n/a	0.732324
LS	SD060921-11R	Morph / Charac	2/3	F	35	1	892.23	187.5	n/a	0.714787	-35.659	228.973	-72.3572	13.7611	151.629	43.8433	0.0696212	n/a	0.841149
LS	SD072121-32R	Morph / Charac	2/3	M	35	1	843.608	167.5	n/a	0.609889	-34.4693	382.397	-94.3604	12.8867	n/a	n/a	n/a	n/a	n/a
LS	SD072419-11L	Characterization	2/3	F	83	0	n/a	n/a	n/a	n/a	n/a	n/a	n/a	n/a	n/a	n/a	n/a	n/a	n/a
LS	SD072419-31L	Characterization	2/3	F	83	0	n/a	n/a	n/a	n/a	n/a	n/a	n/a	n/a	n/a	n/a	n/a	n/a	n/a
LS	SD072419-32L	Characterization	2/3	F	83	0	n/a	n/a	n/a	n/a	n/a	n/a	n/a	n/a	n/a	n/a	n/a	n/a	n/a
LS	SD072919-11R	Characterization	2/3	M	88	0	n/a	n/a	n/a	n/a	n/a	n/a	n/a	n/a	n/a	n/a	n/a	n/a	n/a
LS	SD072919-22R	Characterization	2/3	M	88	0	n/a	n/a	n/a	n/a	n/a	n/a	n/a	n/a	n/a	n/a	n/a	n/a	n/a
LS	SD073119-21R	Characterization	2/3	F	90	0	n/a	n/a	n/a	n/a	n/a	n/a	n/a	n/a	n/a	n/a	n/a	n/a	n/a
LS	SD090719-12L	Characterization	2/3	M	42	0	n/a	n/a	n/a	n/a	n/a	n/a	n/a	n/a	n/a	n/a	n/a	n/a	n/a
LS	SD102119-21L	Characterization	2/3	M	86	0	n/a	n/a	n/a	n/a	n/a	n/a	n/a	n/a	n/a	n/a	n/a	n/a	n/a
LS	SD111219-11L	Characterization	2/3	M	60	0	n/a	n/a	n/a	n/a	n/a	n/a	n/a	n/a	n/a	n/a	n/a	n/a	n/a
LS	SD111219-21L	Characterization	2/3	M	60	0	n/a	n/a	n/a	n/a	n/a	n/a	n/a	n/a	n/a	n/a	n/a	n/a	n/a
LS	SD010620-21R	Characterization	2/3	F	80	0	n/a	n/a	n/a	n/a	n/a	n/a	n/a	n/a	n/a	n/a	n/a	n/a	n/a
LS	SD011420-11R	Characterization	2/3	F	46	0	n/a	n/a	n/a	n/a	n/a	n/a	n/a	n/a	n/a	n/a	n/a	n/a	n/a
LS	SD062420-31R	Characterization	2/3	M	86	0	n/a	n/a	n/a	n/a	n/a	n/a	n/a	n/a	n/a	n/a	n/a	n/a	n/a
LS	SD070220-11R	Characterization	2/3	F	94	0	n/a	n/a	n/a	n/a	n/a	n/a	n/a	n/a	n/a	n/a	n/a	n/a	n/a
LS	SD070220-21R	Characterization	2/3	F	94	0	n/a	n/a	n/a	n/a	n/a	n/a	n/a	n/a	n/a	n/a	n/a	n/a	n/a
LS	SD070220-22R	Characterization	2/3	F	94	0	n/a	n/a	n/a	n/a	n/a	n/a	n/a	n/a	n/a	n/a	n/a	n/a	n/a
LS	SD070220-31R	Characterization	2/3	F	94	0	n/a	n/a	n/a	n/a	n/a	n/a	n/a	n/a	n/a	n/a	n/a	n/a	n/a
LS	SD070920-21R	Characterization	2/3	F	31	0	n/a	n/a	n/a	n/a	n/a	n/a	n/a	n/a	n/a	n/a	n/a	n/a	n/a
LS	SD070920-31R	Characterization	2/3	F	31	0	n/a	n/a	n/a	n/a	n/a	n/a	n/a	n/a	n/a	n/a	n/a	n/a	n/a
LS	SD102219-21R	Characterization	2/3	M	87	0	n/a	n/a	n/a	n/a	n/a	n/a	n/a	n/a	n/a	n/a	n/a	n/a	n/a
BS cells in L2/3
BS	IK010521-11R	Pairs	2/3	F	46	1	55.45	460	19.9019	0.708886	-32.795	135.574	-49.8199	1.10626	n/a	n/a	n/a	n/a	n/a
BS	IK041521-11R	Pairs	2/3	F	33	1	n/a	312.5	17.881	0.785945	-45.8781	233.765	-79.2101	2.48888	41.4286	29.1429	0.166719	n/a	1.08107
BS	IK050421-11R	Pairs	2/3	F	42	1	77.03	225	19.2336	0.488916	-41.3055	371.334	-148.926	10.7727	55	18	n/a	n/a	0.174052
BS	IK060121-41R	Pairs	2/3	F	30	1	89.87	305	18.8645	0.660939	-39.723	300.206	-109.841	4.72695	60	29	0.07168	n/a	0.035
BS	IK122920-12R	Pairs	2/3	M	39	1	202.77	300	n/a	0.593747	-36.1207	242.335	-97.2748	8.03185	40	21	0.2836	n/a	0.0464
BS	SD041521-21R	Pairs	2/3	F	33	1	319.11	280	9.58323	0.270572	-40.2283	641.52	-348.918	13.2161	72.8538	73.0457	0.731063	n/a	0.15899
BS	SD052521-11L	Pairs	2/3	M	37	1	268.99	437	n/a	0.555505	-41.0805	334.961	-129.211	7.9689	20	15	n/a	n/a	0.0612
BS	SD052521-31L	Pairs	2/3	M	37	1	95.01	156.25	14.7017	0.514918	-45.932	344.971	-134.969	7.97628	n/a	n/a	n/a	n/a	n/a
BS	SD060121-21L	Pairs	2/3	F	30	1	38.24	232	17.449	0.583628	-46.7189	296.282	-117.188	3.4886	70	34	0.05633	n/a	0.1237
BS	SD010620-41R	Pairs	2/3	F	80	0	n/a	n/a	n/a	n/a	n/a	n/a	n/a	n/a	n/a	n/a	n/a	n/a	n/a
BS	SD070120-21R	Characterization	2/3	F	93	0	n/a	n/a	n/a	n/a	n/a	n/a	n/a	n/a	n/a	n/a	n/a	n/a	n/a
IS cells in L2/3
IS	IK011221-21R	Pairs	2/3	F	53	1	42.127	232.5	12.275	0.668127	-37.9303	121.195	-64.7583	7.23572	85	37	0.243384	n/a	0.0844243
IS	IK011221-31R	Pairs	2/3	F	53	1	62.3301	375	19.0557	0.689352	-35.3394	119.4	-60.0815	11.0569	n/a	n/a	n/a	n/a	n/a
IS	IK041521-31R	Pairs	2/3	F	33	1	66.4317	243	19.2037	0.700515	-39.1453	270.531	-96.3484	6.52204	100	21	0.134176	n/a	0.268863
IS	IK060121-11R	Pairs	2/3	F	30	1	35.4784	552.5	22.318	0.520467	-48.4289	255.737	-134.888	12.1689	30	42	0.0842547	n/a	0.200677
IS	SD011221-31L	Pairs	2/3	F	53	1	51.7194	128.333	7.49088	0.384153	-27.8442	317.505	-136.719	13.4766	250.029	n/a	n/a	n/a	n/a
IS	SD020121-42L	Pairs	2/3	F	40	1	38.5697	132.5	12.6903	0.45975	-36.8546	272.644	-124.939	4.70123	250.127	n/a	n/a	n/a	n/a
IS	SD050421-12L	Pairs	2/3	F	42	1	n/a	120	8.22659	n/a	n/a	n/a	n/a	n/a	n/a	n/a	n/a	n/a	n/a
IS	SD052521-34L	Pairs	2/3	M	37	1	46.32	233.333	10.4339	n/a	n/a	n/a	n/a	n/a	110.126	n/a	0.0884275	n/a	n/a
IS	SD060921-21L	Morph / Charac	2/3	F	35	1	61.57	159	12.1821	0.385295	-44.4882	747.839	-202.905	5.74554	161.265	42.2381	0.0499073	n/a	0.360555
IS	SD060921-43L	Morph / Charac	2/3	F	35	1	82.8579	200	13.4288	0.437071	-43.0946	444.305	-135.071	9.33304	134.546	59.6092	0.0734881	n/a	0.368837
IS	SD120320-11L	Pairs	2/3	F	33	1	53	82	15.2355	0.380767	-39.2334	544.189	-215.21	13.2019	200.096	n/a	n/a	n/a	n/a
IS	SD120920-11L	Pairs	2/3	M	31	1	37.28	128	6.045	0.290056	-48.8373	845.459	-317.139	8.12073	149.989	n/a	n/a	n/a	n/a
IS	SD121420-13L	Pairs	2/3	M	44	1	40.46	187	16.9996	0.529853	-31.7535	416.504	-128.54	13.9801	139.957	n/a	n/a	n/a	n/a
IS	SD123020-12L	Pairs	2/3	M	40	1	n/a	110	9.21673	0.348863	-34.0851	469.36	-198.975	9.08508	200.098	n/a	n/a	n/a	n/a
IS	SD123020-31L	Pairs	2/3	M	40	1	68.57	104	10.6258	0.469723	-28.8376	427.063	-134.46	13.9389	204.955	n/a	n/a	n/a	n/a
IS	SD031820-32	Pairs	2/3	F	62	0	n/a	n/a	n/a	n/a	n/a	n/a	n/a	n/a	n/a	n/a	n/a	n/a	n/a
IS	SD070920-11	Characterization	2/3	F	31	0	n/a	n/a	n/a	n/a	n/a	n/a	n/a	n/a	n/a	n/a	n/a	n/a	n/a
IS	SD072419-21	Characterization	2/3	F	83	0	n/a	n/a	n/a	n/a	n/a	n/a	n/a	n/a	n/a	n/a	n/a	n/a	n/a
IS	SD072419-41	Characterization	2/3	F	83	0	n/a	n/a	n/a	n/a	n/a	n/a	n/a	n/a	n/a	n/a	n/a	n/a	n/a
IS	SD073119-22	Characterization	2/3	F	90	0	n/a	n/a	n/a	n/a	n/a	n/a	n/a	n/a	n/a	n/a	n/a	n/a	n/a
IS	SD073119-31	Characterization	2/3	F	90	0	n/a	n/a	n/a	n/a	n/a	n/a	n/a	n/a	n/a	n/a	n/a	n/a	n/a
IS	SD102119-11	Characterization	2/3	M	86	0	n/a	n/a	n/a	n/a	n/a	n/a	n/a	n/a	n/a	n/a	n/a	n/a	n/a
LS cells in L4/5
LS	HZ060821-31R	Morph / Charac	4/5	M	34	1	n/a	155	10.4095	0.817239	-21.2716	239.101	-74.428	6.77229	128.901	18.6159	0.0576327	n/a	0.671891
LS	HZ070121-11R	Morph / Charac	4/5	M	35	1	n/a	60	5.63812	n/a	n/a	n/a	n/a	n/a	499.038	n/a	n/a	1.57057	n/a
LS	HZ070121-21R	Morph / Charac	4/5	M	35	1	n/a	n/a	n/a	n/a	n/a	n/a	n/a	n/a	n/a	n/a	n/a	n/a	n/a
LS	HZ070121-51R	Morph / Charac	4/5	M	35	1	n/a	n/a	n/a	n/a	n/a	n/a	n/a	n/a	n/a	n/a	n/a	n/a	n/a
LS	HZ070721-11R	Morph / Charac	4/5	M	37	1	n/a	125	15.078	0.670006	-19.2973	83.9437	-30.599	10.4675	n/a	n/a	n/a	0.94523	n/a
LS	HZ072821-51R	Morph / Charac	4/5	M	35	1	749.22	146	12.623	1.10544	-35.8429	132.935	-51.0864	14.0198	157.35	26.2698	0.035441	1.04278	0.766689
LS	HZ072821-61R	Morph / Charac	4/5	M	35	1	970.17	190	10.3009	0.992985	-36.2396	170.39	-61.3403	11.8713	119.371	21.81	0.0785812	n/a	0.661591
LS	SD060921-31L	Morph / Charac	4/5	F	35	1	803.367	147.5	10.893	0.322767	-43.1305	604.309	-248.566	9.73053	131.4	n/a	n/a	0.805169	n/a
LS	SD061621-11L	Morph / Charac	4/5	F	45	1	852.745	97.5	8.191	0.468069	-38.353	455.444	-136.129	10.1639	220.38	32.9917	0.0475441	n/a	0.660463
LS	SD061621-12L	Morph / Charac	4/5	F	45	1	n/a	n/a	n/a	n/a	n/a	n/a	n/a	n/a	n/a	n/a	n/a	n/a	n/a
LS	SD072121-11R	Morph / Charac	4/5	M	35	1	778.03	112.5	10.9585	0.463364	-40.0155	484.952	-119.54	14.738	188.347	43.5866	0.0322503	0.960883	0.829668
LS	SD072121-31R	Morph / Charac	4/5	M	35	1	n/a	137.5	8.36401	0.443938	-28.3078	583.035	-136.868	16.2425	n/a	n/a	n/a	n/a	n/a
LS	SD072821-13L	Morph / Charac	4/5	M	35	1	807.373	100	10.86	0.45494	-35.7993	523.106	-124.808	16.765	193.726	n/a	n/a	1.03768	n/a
LS	SD072821-23L	Morph / Charac	4/5	M	35	1	n/a	162.5	13.7654	0.581746	-35.7819	396.973	-94.1162	17.9962	n/a	n/a	n/a	n/a	n/a
LS	SD072919-21R	Characterization	4/5	M	88	0	n/a	n/a	n/a	n/a	n/a	n/a	n/a	n/a	n/a	n/a	n/a	n/a	n/a
LS	SD072919-31R	Characterization	4/5	M	88	0	n/a	n/a	n/a	n/a	n/a	n/a	n/a	n/a	n/a	n/a	n/a	n/a	n/a
LS	SD102319-21R	Characterization	4/5	M	118	0	n/a	n/a	n/a	n/a	n/a	n/a	n/a	n/a	n/a	n/a	n/a	n/a	n/a
LS	SD010620-31R	Characterization	4/5	F	80	0	n/a	n/a	n/a	n/a	n/a	n/a	n/a	n/a	n/a	n/a	n/a	n/a	n/a
LS	SD011420-31R	Characterization	4/5	F	46	0	n/a	n/a	n/a	n/a	n/a	n/a	n/a	n/a	n/a	n/a	n/a	n/a	n/a
LS	SD012120-11R	Characterization	4/5	M	53	0	n/a	n/a	n/a	n/a	n/a	n/a	n/a	n/a	n/a	n/a	n/a	n/a	n/a
LS	SD012120-21R	Characterization	4/5	M	53	0	n/a	n/a	n/a	n/a	n/a	n/a	n/a	n/a	n/a	n/a	n/a	n/a	n/a
LS	SD120219-11L	Characterization	4/5	M	80	0	n/a	n/a	n/a	n/a	n/a	n/a	n/a	n/a	n/a	n/a	n/a	n/a	n/a
LS	SD120519-11L	Characterization	4/5	M	48	0	n/a	n/a	n/a	n/a	n/a	n/a	n/a	n/a	n/a	n/a	n/a	n/a	n/a
LS	SD120519-21L	Characterization	4/5	M	48	0	n/a	n/a	n/a	n/a	n/a	n/a	n/a	n/a	n/a	n/a	n/a	n/a	n/a
LS	SD061320-11R	Characterization	4/5	M	120	0	n/a	n/a	n/a	n/a	n/a	n/a	n/a	n/a	n/a	n/a	n/a	n/a	n/a
LS	SD062420-11R	Characterization	4/5	M	86	0	n/a	n/a	n/a	n/a	n/a	n/a	n/a	n/a	n/a	n/a	n/a	n/a	n/a
LS	SD010620-11R	Characterization	4/5	F	80	0	n/a	n/a	n/a	n/a	n/a	n/a	n/a	n/a	n/a	n/a	n/a	n/a	n/a
LS	SD031620-31L	Characterization	4/5	M	60	0	n/a	n/a	n/a	n/a	n/a	n/a	n/a	n/a	n/a	n/a	n/a	n/a	n/a

## Sheet: summary
Average						N						SEM
Parameter	LS in L2/3	LS in L4/5	IS in L2/3	BS in L2/3		Parameter	LS in L2/3	LS in L4/5	IS in L2/3	BS in L2/3		Parameter	LS in L2/3	LS in L4/5	IS in L2/3	BS in L2/3		LS in L2/3	LS in L4/5	IS in L2/3	BS in L2/3
Latency	805.257	826.817	52.8242	143.309		Latency	39	6	13	8		Latency	21.5205	31.9123	4.04978	37.4589		805 ± 22	827 ± 32	53 ± 4	143 ± 37
Rm	188.453	130.318	199.144	300.861		Rm	61	11	15	9		Rm	7.11949	10.9071	31.8668	32.4587		188 ± 7	130 ± 11	199 ± 32	301 ± 32
Tau	12.2462	10.6438	13.0285	16.8021		Tau	41	11	15	7		Tau	0.489597	0.797579	1.21984	1.36172		12 ± 0.5	11 ± 0.8	13 ± 1.2	17 ± 1.4
AP HW	0.704571	0.632049	0.481846	0.573673		AP HW	53	10	13	9		AP HW	0.0245364	0.0823539	0.0371727	0.0492013		0.70 ± 0.02	0.63 ± 0.08	0.48 ± 0.04	0.57 ± 0.05
AP thresh	-34.6173	-33.4039	-38.144	-41.0869		AP thresh	53	10	13	9		AP thresh	1.06978	2.49523	1.87195	1.55552		-35 ± 1	-33 ± 2	-38 ± 2	-41 ± 2
AP rise	283.301	367.419	403.979	322.327		AP rise	53	10	13	9		AP rise	14.9471	61.4554	60.1737	46.4346		283 ± 15	367 ± 61	404 ± 60	322 ± 46
AP fall	-84.2763	-107.748	-150.003	-135.04		AP fall	53	10	13	9		AP fall	3.85672	19.5861	19.2109	28.5603		-84 ± 4	-108 ± 20	-150 ± 19	-135 ± 29
AHP	14.3613	12.8767	9.88974	6.64184		AHP	53	10	13	9		AHP	0.491408	1.14874	0.913174	1.32947		14.4 ± 0.5	12.9 ± 1.1	9.9 ± 0.9	6.6 ± 1.3
Rheobase	150.017	204.814	155.092	51.326		Rheobase	29	8	13	7		Rheobase	17.5644	43.8972	18.066	7.08529		150 ± 18	205 ± 44	155 ± 18	51 ± 7
Firing rate	38.0759	28.6548	40.3695	31.3127		Firing rate	15	5	5	7		Firing rate	2.84525	4.44458	6.17596	7.41396		38 ± 3	29 ± 4	40 ± 6	31 ± 7
CV of ISI	0.0534403	0.0502899	0.112273	0.261878		CV of ISI	17	5	6	5		CV of ISI	0.00415388	0.00838979	0.0285291	0.124114		0.053 ± 0.004	0.050 ± 0.008	0.112 ± 0.029	0.262 ± 0.124
AI (near Rb)	1.14313	1.06039	n/a	n/a		AI (near Rb)	23	6	n/a	n/a		AI (near Rb)	0.0808522	0.107922	n/a	n/a		1.14 ± 0.08	1.06 ± 0.11	n/a ± n/a	n/a ± n/a
AI (2xRb)	0.759022	0.718061	0.256671	0.240058		AI (2xRb)	15	5	5	7		AI (2xRb)	0.0250012	0.0342482	0.0530688	0.141699		0.76 ± 0.03	0.72 ± 0.03	0.26 ± 0.05	0.24 ± 0.14
						minimum	15	5	5	5
